# Supplementary material for: Effective loading of cisplatin into a nanoscale UiO-66 metal–organic framework with preformed defects
Source: Royal Society of Chemistry journal article supplement (doi:10.1039/c9dt00719a), 2019-01-01
Supplement: c9dt00719a1.pdf [file c9dt00719a1.pdf]

## **Electronic Supplementary Information (ESI)**

### **Effective loading of cisplatin into a nanoscale UiO-66 metal–organic framework with preformed defects†**

Shi-Xin Lin,<sup>a</sup> Wei-Lun Pan,<sup>b</sup> Ru-Jie Niu,<sup>a</sup> Yan-Liu,<sup>a</sup> Jin-Xiang Chen,<sup>\*b</sup> Wen-Hua Zhang,<sup>\*a</sup>

Jian-Ping Lang<sup>\*a</sup> and David J. Young<sup>c</sup>

<sup>a</sup> College of Chemistry, Chemical Engineering and Materials Science, Soochow University, Suzhou 215123, China. Email: whzhang@suda.edu.cn; jplang@suda.edu.cn

<sup>b</sup> Guangdong Provincial Key Laboratory of New Drug Screening, School of Pharmaceutical Sciences, Southern Medical University, Guangzhou 510515, China. Email: jxchen@smu.edu.cn

<sup>c</sup> College of Engineering, Information Technology & Environment, Charles Darwin University, Darwin, Northern Territory 0810, Australia

### **Contents**

|                                                                                                                                                                                                                                          |   |
|------------------------------------------------------------------------------------------------------------------------------------------------------------------------------------------------------------------------------------------|---|
| <b>Scheme S1</b> Synthetic strategies and for loading cisplatin into UiO-66. The second strategy was halted because of difficulties encountered in preparing the cisplatin precursor.....                                                | 2 |
| <b>Fig. S1</b> TGA curves of UiO-66-350 (black) and UiO-66-TFA (red).....                                                                                                                                                                | 3 |
| <b>Fig. S2</b> FT-IR spectra of UiO-66-350-PA (red) and UiO-66-350-PA-Pt (blue). ....                                                                                                                                                    | 3 |
| <b>Fig. S3</b> EDX spectrum of UiO-66-350-PA-Pt.....                                                                                                                                                                                     | 3 |
| <b>Fig. S4</b> UV-Vis spectra for release of cisplatin at different times. ....                                                                                                                                                          | 4 |
| <b>Fig. S5</b> Agarose GE patterns for P-DNA loading into UiO-66-350-PA-Pt. Lane 1-7 DNA ( 50 nM) with UiO-66-350-PA-Pt at the concentrations of 5.4, 10.8, 27.0, 54.0, 162.0, 324.0 and 486.0 μM, respectively, Lane 8: DNA marker..... | 4 |
| <b>Table S1</b> The ICP analysis show the concentration of the elements in UiO-66-350-PA-Pt (the ratio of Zr : Pt : P is 9 : 1 : 1 corresponding to the Zr <sub>6</sub> : Pt : P being 1.5 : 1 : 1).....                                 | 5 |
| <b>Table S2</b> BET surface area ( $S_{\text{BET}}$ ) and total pore volume ( $V_p$ ) of UiO-66-TFA, UiO-66-350, UiO-66-350-PA and UiO-66-350-PA-Pt. ....                                                                                | 5 |
| <b>Table S3</b> The ICP analysis showing the concentration of platinum at intervals after release. $C_1$ is the concentration after dilution of $C_2$ (the actual concentration) by 25 times. ....                                       | 5 |



Strategy one:



Strategy two:



**Scheme S1** Synthetic strategies and for loading cisplatin into UiO-66. The second strategy was halted because of difficulties encountered in preparing the cisplatin precursor.



Fig. S1 TGA curves of UiO-66-350 (black) and UiO-66-TFA (red).



Fig. S2 FT-IR spectra of UiO-66-350-PA (red) and UiO-66-350-PA-Pt (blue).



Fig. S3 EDX spectrum of UiO-66-350-PA-Pt.



**Fig. S4** UV-Vis spectra for release of cisplatin at different times.



**Fig. S5** Agarose GE patterns for P-DNA loading into UiO-66-350-PA-Pt. Lane 1-7 DNA ( 50 nM) with UiO-66-350-PA-Pt at the concentrations of 5.4, 10.8, 27.0, 54.0, 162.0, 324.0 and 486.0 μM, respectively, Lane 8: DNA marker.

**Table S1** The ICP analysis show the concentration of the elements in UiO-66-350-PA-Pt (the ratio of Zr : Pt : P is 9 : 1 : 1 corresponding to the Zr<sub>6</sub> : Pt : P being 1.5 : 1 : 1).

| Element | C <sub>v</sub> (mg/L) | C <sub>d</sub> (mmol/L) |
|---------|-----------------------|-------------------------|
| Zr      | 95.12                 | 1.04                    |
| Pt      | 21.88                 | 0.11                    |
| P       | 3.490                 | 0.11                    |

**Table S2** BET surface area (S<sub>BET</sub>) and total pore volume (V<sub>p</sub>) of UiO-66-TFA, UiO-66-350, UiO-66-350-PA and UiO-66-350-PA-Pt.

| Samples          | S <sub>BET</sub> (m <sup>2</sup> g <sup>-1</sup> ) | V <sub>p</sub> (cm <sup>3</sup> g <sup>-1</sup> ) |
|------------------|----------------------------------------------------|---------------------------------------------------|
| UiO-66-TFA       | 1368                                               | 0.6246                                            |
| UiO-66-350       | 1000                                               | 0.5433                                            |
| UiO-66-350-PA    | 746                                                | 0.4460                                            |
| UiO-66-350-PA-Pt | 552                                                | 0.4044                                            |

**Table S3** The ICP analysis showing the concentration of platinum at intervals after release. C<sub>1</sub> is the concentration after dilution of C<sub>2</sub> (the actual concentration) by 25 times.

| Samples | C <sub>1</sub> (mg/L) | C <sub>2</sub> (mg/L) |
|---------|-----------------------|-----------------------|
| 1h      | 2.99                  | 74.75                 |
| 2h      | 3.64                  | 91.00                 |
| 4h      | 3.73                  | 93.25                 |
| 6h      | 3.84                  | 96.00                 |
| 8h      | 3.91                  | 97.75                 |
| 10h     | 4.14                  | 106.00                |
| 240h    | 4.38                  | 109.50                |
